# EEG biomarkers of free recall

Kahana, M. J., Katerman, B., Keane, C., Li, Y., and Pazdera, J. K.  
University of Pennsylvania

## Abstract

Brain activity in the moments leading up to successful verbal recall provide a window into the cognitive processes underlying memory retrieval. But these same recordings also subsume neural signals unrelated to mnemonic retrieval, such as response-related motor activity. Here we examined spectral EEG biomarkers of successful recall under an extreme manipulation of mnemonic demands: subjects either recalled items after a few seconds or several days. This manipulation isolated EEG components specifically related to episodic retrieval. Theta and gamma power (4-8 Hz and 40-128 Hz respectively) increased immediately prior to long-delay recall, whereas 8-20 Hz power decreased. A direct comparison of long-delay and immediate recall revealed a nearly identical pattern, indicating that these spectral biomarkers of successful retrieval reflect memory-specific processes. Ruling out a confound of motor related activity, these results identify theta and gamma activity as biomarkers of successful episodic memory retrieval.

## Introduction

Our ability to recall past experiences is the hallmark of episodic memory. In laboratory studies, lists of discrete nameable items, such as words, serve as sets of mini-experiences, and the act of recall is the motor output (vocalization or typing) of the remembered items. The magic of memory retrieval happens during the moments leading up to the motor output, but this period also includes other non-mnemonic signals, such as the planning of a motor response and the activation of semantic and perceptual representations associated with the remembered item.

Prior research using intracranial EEG recordings has uncovered a network of brain regions in which increased high frequency activity and concomitant decreases in lower frequency activity mark the moments leading up to spontaneous verbal recall as compared with matched periods of silence during the recall period (Burke, Sharan, et al., 2014; Greenberg, Burke, Haque, Kahana, & Zaghoul, 2015; E. Solomon et al., 2017). In some cortical sub-regions and for some retrieval contrasts, low-frequency (3-8 Hz) theta activity increases

---

The authors gratefully acknowledge support from National Institutes of Health grant MH55687. All authors contributed equally to this manuscript and the order of authorship was determined alphabetically. Correspondence concerning this should be addressed to Michael J. Kahana ([kahana@psych.upenn.edu](mailto:kahana@psych.upenn.edu)).

during the putative retrieval period (see Herweg et al., 2016, for a review). Researchers would ideally like to use these recall biomarkers to probe the dynamics of memory retrieval in the absence of motor output. Such signals could, for example, be used to study the hypothesized role of covert retrieval in memory consolidation and other learning processes. However, the interpretation of these recall biomarkers is problematized by the concomitant presence of non-mnemonic neural processes that accompany recall even under minimal memory demands.

Comparisons of correct and incorrect recalls (intrusions) offers a potential solution (Long et al., 2017). These studies have shown, for example, that hippocampal high-frequency activity increases more so prior to correct recalls than prior to intrusion errors. As incorrect recalls presumably involve identical, or at least very similar, motor planning activity, differences between these conditions more likely reflect mnemonic retrieval. However, intrusions may show similar signals to those of successful recall as the subject is actively engaged in recall of a word they believe to have been previously presented. As such, these contrasts may mask important neural correlates of memory retrieval that appear similarly for both true and false memories.

The present study sought to elucidate the biomarkers of episodic memory retrieval by examining recall of words under an extreme manipulation of retrieval demands: In an immediate recall condition, subjects recalled a single just-presented word after a brief delay. In a long-delayed recall test, subjects attempted to recall items learned across multiple days prior to the test day (i.e., a minimum of 16 hours prior to the recall period). Over the course of ten experimental sessions administered on different days, subjects contributed data in each of these conditions.

## Methods

### Subjects

Fifty-seven young adults (ages 18–35), recruited among the students and staff at the University of Pennsylvania and neighboring institutions, each contributed 10 sessions of immediate word recall data and five sessions of delayed recall data. Subjects were excluded ( $n = 17$ ) if they did not complete at least 7 sessions or if they had an average rate of recall lower than 70% during the immediate recall task. The data reported here came from Experiment 5 of the Penn Electrophysiology of Encoding and Retrieval Study (PEERS). This is the first paper to report data from PEERS-Experiment 5. All PEERS data may be downloaded from our public repository <http://memory.psych.upenn.edu/data>.

### Experimental Task and Behavioral Analyses

Each of the first five sessions (henceforth, *Phase I*) consisted of one block of 10 practice trials, followed by 24 blocks of 24 trials each. Each block began with a 10-second countdown. After the countdown was complete, the first trial of the block began. On each trial, a black screen was shown for a jittered 1000–1600 ms (uniformly distributed), after which a single word appeared onscreen in white text for 1200–1800 ms (uniformly distributed). Following presentation, the screen went blank again and subjects were instructed to pause briefly, and then vocalize the word they had just seen. If they began speaking within 1.0 seconds of word offset, the message “Too fast.” appeared on the screen in red text. By avoiding these

messages subjects could increase the size of their bonus payment. After the subject finished speaking, a tone sounded, marking the end of the current trial. Speech was detected using a volume amplitude threshold. In addition to the 10-second countdown between blocks, two 2-minute mid-session breaks were administered after block eight and block 16. Phase II of the experiment began on the day of the sixth session and continued to the final session of the experiment. In Phase II the practice block and 24 experimental blocks were preceded by a 10-minute initial externalized free recall period. Subjects were instructed to recall as many words as possible from the previous sessions in any order, while also vocalizing any additional words that come to mind in their attempt to recall these items (e.g., Kahana, Dolan, Sauder, & Wingfield, 2005; Lohnas, Polyn, & Kahana, 2015; Zaromb et al., 2006). Our lists comprised the same 576-word pool as used in the PEERS4 study (Aka, Phan, & Kahana, 2020; Kahana, Aggarwal, & Phan, 2018; Weidemann & Kahana, 2020). Subjects saw the same 576 words in each of their 10 sessions, but the ordering of these words was randomized for each session.

### EEG Post-Processing and Spectral Decomposition

We recorded electroencephalographic (EEG) data using a 128-channel Biosemi system with a 2048 Hz sampling rate. We applied the following preprocessing steps to the data from each session. First, we applied a 0.5 Hz highpass filter to eliminate baseline drift. We then partitioned the recording into thirds by splitting at the end of each mid-session break. For each partition of the data, we identified bad channels as those with extremely high or low ( $|z| > 3$ ) log-variance, or which had an extremely high ( $z > 3$ ) Hurst exponent relative to other channels. We identified bad channels separately for each partition, as problematic electrodes were often corrected during mid-session breaks.<sup>1</sup> We then dropped the bad channels from their respective partitions and applied a common average reference scheme. We next performed independent component analysis (ICA) on each of the three partitions to decompose the data into  $128 - (n + 1)$  components, where  $n$  is the number of bad channels that were dropped, and used the localized component filtering method of DelPozo-Banos and Weidemann (2017) to filter artifactual time points from the components. Data points were identified as artifacts if they exceeded that component's interquartile range by three times the magnitude of that range. We then reconstructed the original channels from the cleaned components, interpolated bad channels using spherical splines, and applied a fourth-order Butterworth notch filter at 60 Hz to eliminate electrical line noise.

We used a multitaper method (MNE-Python software package; Gramfort et al., 2013, 2014) to estimate spectral power at each electrode over 4–128 Hz and log transformed the resulting signal. Electrodes were grouped into regions of interest (see Figure 2) and the corresponding powers averaged for each frequency. We spaced frequencies every 2 Hz in the range of 4–26 Hz, and every 6 Hz within 26–128 Hz, resulting in 29 frequencies of interest. We avoided the Morlet wavelet method, as convolving low frequency wavelets using buffer periods may allow speech artifacts to intrude in the power estimates of intervals just prior to subjects' vocal responses. We used a 500 ms moving window centered at multiple time-points relative to the start of recall events, with a 50 ms step size. To minimize potential

---

<sup>1</sup>Recordings during break periods were frequently noisy as a result of these adjustments and participant movement, and were therefore excluded when calculating variances and Hurst exponents, as well as when performing ICA and calculating artifact thresholds for localized component filtering.

artifacts, we extracted spectral patterns in a 500 ms window ending 250 ms prior to speech onset unless otherwise noted. Vocalizations occurring within 1000 ms of stimulus offset or a previous vocalization were excluded from analysis. In addition to the interval preceding vocalization, we identified 1000 ms "deliberation" periods of silence during the delayed recall test that did not overlap with a preceding vocalization or a subsequent retrieval interval of interest. Deliberation periods for both immediate and delayed recall contrasts were matched to recall events using linear sum optimization, which minimizes the total time difference between recall events and matched deliberation periods, and were constrained to events between the first and last delayed recalls within a session.

During delayed recall, we defined successful memory events as the memory search intervals immediately preceding recalls of list items (correct recalls). Unsuccessful memory search periods preceded recall errors (i.e., intrusions from outside of the word pool: extra-list intrusions). To identify spectral features specific to successful recall on the delayed recall test, we performed contrasts against successful immediate recall and successful delayed recall across eight regions of interest (ROI). Only immediate recall events from the first ten minutes of the first five sessions were included in these contrasts; this time period is matched to the delayed recall that occurs in later sessions and only covers immediate recall events where the subject is unaware of future delayed recall tests. We also performed a contrast between immediate recall events from the first five sessions and deliberation periods from the long-delayed recall test. We aggregated desired events from each session within subjects and performed a *t*-test to produce a variance-normalized difference score for every frequency-by-ROI pair within subjects. We subsequently used two-tailed one sample *t*-tests (with FDR correction) to assess group-level differences.

## Results

Figure 1A illustrates the basic structure of the experiment. In each of 10 experimental sessions, subjects performed a simple immediate-recall task. As each of 576 words appeared individually, subjects read each word silently, and then, after a one second delay, recited the word aloud. At the start of the 6th session (phase two), subjects were given a surprise long-delay recall task: We asked them to recall as many of the 576 words as they could remember in any order as well as any words that come to mind that may have not been presented in previous sessions. We then had subjects perform the same immediate recall task as on previous sessions. Sessions 7-10 replicated the methods of Session 6 except that the initial recall test could no longer be deemed a surprise.

As expected, subjects recalled items with very high accuracy (above 96%) in the immediate recall condition. Figure 1B illustrates accuracy of immediate recall across the 24 test blocks separately for phases one and two. Accuracy fell slightly across blocks but recovered after each of the two-minute breaks (see Figure 1A), possibly due to build-up and release from proactive interference (e.g., Lohnas et al., 2015; Underwood, 1957). Figure 1C illustrates accuracy of long-delay free recall. On the first session of phase two, subjects recalled an average of 29 words (5% of the total pool of 576 words). Their performance on subsequent sessions increased dramatically, reaching an average recall rate of 103 items by the 10th session. This rate of increase (about 25 items per session) is much higher than the implied rate of learning across sessions 1-5, but this likely reflects the difference between incidental and intentional encoding.

Figure 1D illustrates the number of extra-list intrusions committed by subjects across the five sessions of phase two. Here we see that subjects committed a much larger percentage of intrusions than seen in standard within-session immediate and delayed recall tasks (Zaromb et al., 2006). However, the overall fraction of intrusions decreased over sessions, dropping from 37% on Session 6 to 23% on Session 10. Given the unusually-long delay in our free recall condition, and the very high rates of recall achieved by the 10th session, we asked whether inter-response times (IRTs) across the recall period exhibited the same pattern of growth as documented in more standard free-recall paradigms (Rohrer & Wixted, 1994; Murdock & Okada, 1970). Figure 1E shows average IRTs based on the total number of recalled words during delayed-recall sessions. This analysis demonstrates when subjects recall many items, they exhibit much faster IRT overall. However, subjects still display a sharp increase in their IRTs as they approach their final recalled item.

Our primary question concerned how neural activity, as measured through spectral analysis of EEG recordings, signaled the process of spontaneous retrieval of previously experienced items. We first addressed this question by comparing the 500 ms pre-vocalization period in the long-delay recall condition with matched periods of silence separated by at least 0.5 sec from prior and subsequent recalls (we refer to these as deliberation periods; see *Methods*). This comparison of retrieval and deliberation periods revealed increased high-frequency activity and decreased alpha band power across most regions of interest (See Fig. 2A), extending previous intracranial-recording studies that identified similar retrieval biomarkers in both cued recall and free recall tasks (Burke, Ramayya, & Kahana, 2015; Burke, Sharan, et al., 2014; Greenberg et al., 2015). Whereas those earlier studies examined recall that took place within minutes of item encoding, the present study asked subjects to recall items that had not been seen (experimentally) for at least 16 hours.

At anterior electrodes we observed increased theta-band activity during the pre-vocalization memory-retrieval period. Although previous studies have frequently reported theta increases during successful recognition memory (Addante, Watrous, Yonelinas, Ekstrom, & Ranganath, 2011; Guderian & Düzel, 2005; Herweg et al., 2016; Osipova et al., 2006) most (standard) free recall studies find retrieval-related *decreases* in theta and alpha band power (Burke, Sharan, et al., 2014; Kragel, Koban, Barrett, & Wager, 2018; E. Solomon et al., 2017; E. A. Solomon, Stein, et al., 2019). However, several free and cued recall studies have found mixed results, with positive effects in specific brain regions, such as right anterior temporal pole (Burke, Long, et al., 2014) and for specific contrasts, such as semantically-clustered vs. non-clustered recall transitions (E. A. Solomon, Lega, Sperling, & Kahana, 2019). Our study demonstrates retrieval-related increases in low theta power coupled with alpha-band decreases in a long-delay recall task, conditions likely to place stronger demands on associative retrieval processes (Herweg, Solomon, & Kahana, 2020).

Comparisons of pre-vocalization and deliberation intervals do not, however, uniquely identify the process of memory retrieval. This is because prevocalization periods also differ from deliberation in the presence of premotor activity related to the vocalization of recalled items. Switching to another recall modality, e.g., typing, would simply replace this confound with a different one. We therefore employed an immediate recall task as a control for motor activity that may confound our comparison between pre-vocalization and deliberation intervals.

Using the pre-vocalization period in our immediate-recall task as a control, we found

that increased theta, decreased alpha, and increased HFA mark successful long-delay recall. This comparison recapitulates the spectral pattern observed in our comparison between long-delay recall and deliberation, but without the confound of vocalization present in Figure 2A and earlier studies. One difference, however, is that in our tighter contrast between immediate recall and long-delay recall, the retrieval related theta effect appeared to be restricted to anterior-inferior ROIs. Given the far greater demands on episodic memory retrieval in the long-delay condition, but the matched vocalization in both conditions, we interpret these biomarkers as reflecting neural correlates of context-dependent memory retrieval. Comparisons between immediate recall and deliberation (Figure 2C) further support this interpretation. Here we see that trying to retrieve after a long delay (in the deliberation periods) exhibits higher HFA and low alpha band power than during the period immediately preceding a motor response (in the immediate recall condition).

Because high-frequency signals provide excellent temporal resolution, we sought to examine the timing of the increased retrieval-related HFA seen prominently in posterior ROIs. Figure 3 shows the time course of high-frequency activity (HFA) leading up to retrieval in the long delay and immediate recall conditions. We illustrate this time course separately for immediate recalls contributed during phases one and two. For all three conditions, HFA rose in the moments leading up to recall, but the prevocalization HFA was highest for delayed recall, lower for phase-two immediate recall, and lowest for phase-one immediate recall. For comparison, we indicate the baseline gamma power in the long delay deliberation periods. This ordering of conditions aligns with the hypothesized episodic memory retrieval demands across these conditions (such demands being highest in delayed recall, and lowest in immediate recall when a memory test is not expected). Given that the expectation of a subsequent test would lead to better memory encoding during phase two, as shown in Figure 1C, mnemonic processes likely exerted a greater influence on immediate recall in phase two than in phase one.

## Discussion

Humans possess a remarkable ability to search their memory for previously experienced items learned in a given context. When asked to recall without the aid of specific cues, subjects generate their own retrieval cues, based upon the context at the time of test as well as the contextual representations evoked by recently remembered items (Kahana, 2020). Here we used scalp EEG to examine the neural correlates of spontaneous memory retrieval under conditions designed to vary subjects' reliance on contextual retrieval between two extremes: In a long-delay recall condition, we asked subjects to freely recall items not seen in at least 16 hours but encoded on previous sessions; in an immediate recall condition, we asked subjects to read a word, pause for  $> 1$  seconds, and then speak the word aloud. We chose these extreme contrasts to help distinguish pre-motor activity related to vocalization from context-dependent memory-retrieval processes required in the long-delay task.

Subjects made very few errors ( $< 4\%$ ) during the immediate recall task, despite having to recite 576 words. They performed this task, with the same set of words, on 10 sessions administered on separate days. We surprised subjects at the start of Session 6 by asking them to recall as many of the 576 items as they could remember from earlier sessions. On this first long-delayed test, subjects recalled an average of 29 items (5.0%). However, performance rose rapidly on subsequent sessions. By the start of the 10th session,



subjects correctly recalled an average of 103 unique items (17.8%). Comparing pre-retrieval EEG activity during this long-delayed test with the immediate recall condition allowed us to identify the neural correlates of episodic memory retrieval while controlling for retrieval-related motor activity.

Most prior EEG investigations of human memory have either compared encoding of subsequently remembered and forgotten items (Staudigl & Hanslmayr, 2013; Klimesch, Doppelmayr, Russegger, & Pachinger, 1996; Burke et al., 2015; E. Solomon et al., 2017) or have compared successful and unsuccessful discrimination between targets and lures in a recognition task (Jacobs, Hwang, Curran, & Kahana, 2006; van Vugt, Sekuler, Wilson, & Kahana, 2013; Guderian & Düzel, 2005; Hsieh & Ranganath, 2014). In the present study we focused on the EEG correlates of successful free recall, a process rarely studied using non-invasive recording methods due to the presence of large electromyographic (EMG) artifacts caused by vocalization during recall.

Contrasting immediate recall of a single word with long-delayed free recall of the entire 576-word pool identified a spectral signature of successful episodic memory retrieval. Increased theta and gamma band power (4-8 Hz and  $> 40$  Hz respectively), coupled with reduced alpha and beta band power, marked periods of successful memory retrieval. This spectral signature appears to identify the neural activity related to context-dependent memory retrieval. Our contrast of immediate recall and long-delay recall allowed us to disentangle the premotor signals and electromyographic signals leading up to recall from the memory retrieval process required to remember items not seen in 24 hours or longer. These findings help to establish theta and gamma activity in the periods preceding recall as a spectral signature of episodic memory retrieval.

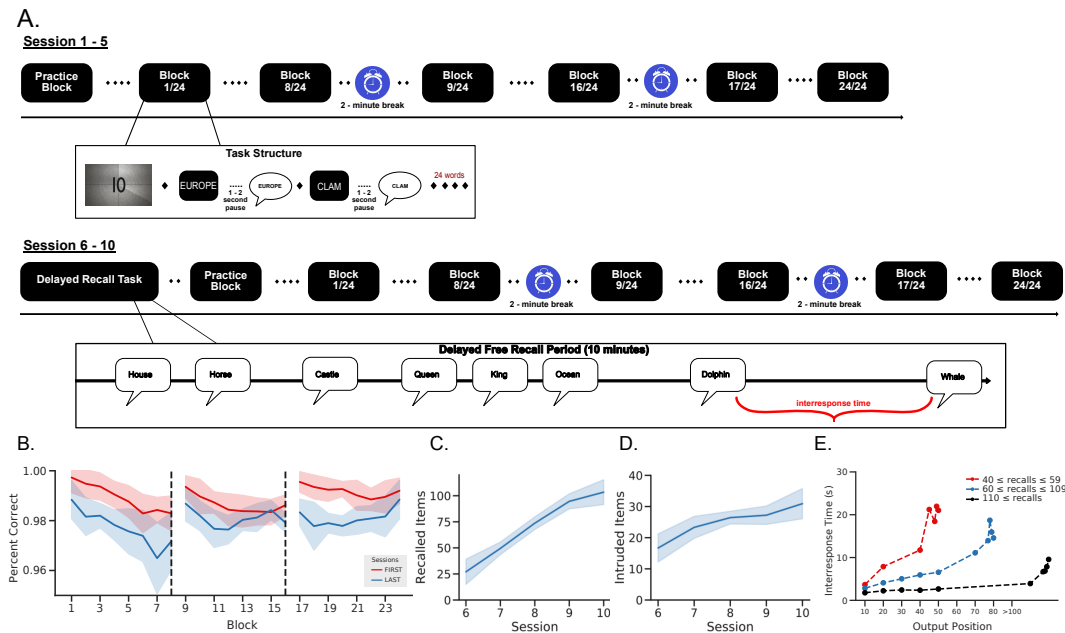

**Figure 1. Experimental Paradigm and Behavioral Data.** **A.** During Sessions 1-5, subjects performed an immediate recall task for each of 576 words, silently reading a word which they verbally recalled after waiting approximately 1 second. A "too fast" warning appeared if subjects began speaking before the 1.0 second minimum delay period. On average, subjects responded 1.53 s after word onset. Each of sessions 6-10 began with subjects attempting to freely recall the 576 words that they had seen on each of the preceding sessions along with any other words that come to mind during a 10 minute retrieval interval. Subjects then performed the same immediate recall task as on earlier sessions. **B.** Subjects exhibited very high levels of immediate recall across all sessions, with performance dropping modestly across blocks and recovering following breaks. **C.** Subjects exhibited modest levels of delayed recall on the first (surprise) recall test given on Session 6, but performance rose sharply across subsequent sessions, hitting an average of 103 correct recalls by the final session. **D.** Intrusions similarly rose across sessions, but much less quickly than successful recalls. **E.** Inter-response times (IRTs) increased with output position; on sessions where subjects recalled a larger proportion of items, IRTs were generally faster throughout the retrieval period but rose sharply during the last few correct recalls.



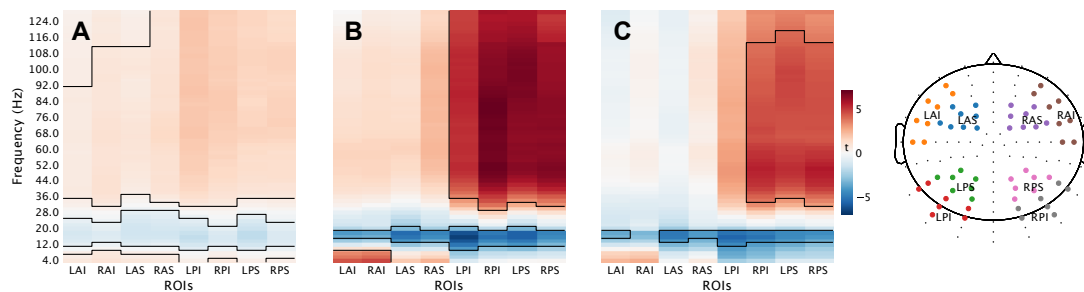

*Figure 2.* Statistical maps illustrating relative increases (red) and decreases (blue) in spectral power for pairs of experimental conditions across eight regions of interest. Frequency-ROI pairs within black borders showed significant power changes. **A.** Delayed Recall vs. Deliberation. **B.** Delayed Recall vs. Immediate Recall. **C.** Deliberation vs. Immediate Recall. Panels **A** and **B** use matched time periods from the first five sessions of Immediate Recall and the five sessions of Delayed Recall following those first five sessions. Significant regions found by FDR-corrected  $t$ -tests on within subject difference scores ( $n = 40$ ;  $p < .05$ ). Electrodes locations corresponding to each ROI appear on a schematic view of an electrode net.

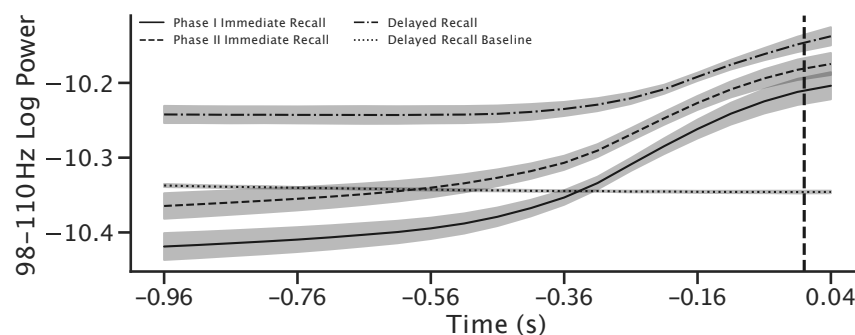

*Figure 3.* **Time course of high-frequency activity leading up to correct recalls.** Delayed recall, immediate recall, and delayed recall baseline log high-frequency activity (98-110 Hz power) at posterior electrodes in the 1.0 second leading up to vocalization of recalled items, averaged for all correctly recalled items and across subjects. Results are shown separately for phases one and two. Error bands reflect 95% confidence computed by the method of Loftus and Masson (1994).

References

- Addante, R. J., Watrous, A. J., Yonelinas, A. P., Ekstrom, A. D., & Ranganath, C. (2011). Prestimulus theta activity predicts correct source memory retrieval. *Proceedings of the National Academy of Sciences, USA*, *108*(26), 10702-10707.
- Aka, A., Phan, T., & Kahana, M. J. (2020). Predicting recall of words and lists. *Journal of Experimental Psychology: Learning, Memory, and Cognition*.
- Burke, J. F., Long, N. M., Zaghoul, K. A., Sharan, A. D., Sperling, M. R., & Kahana, M. J. (2014). Human intracranial high-frequency activity maps episodic memory formation in space and time. *NeuroImage*, *85*, 834–843. doi: 10.1016/j.neuroimage.2013.06.067
- Burke, J. F., Ramayya, A. G., & Kahana, M. J. (2015). Human intracranial high-frequency activity during memory processing: Neural oscillations or stochastic volatility? *Current Opinion in Neurobiology*, *31*, 104–110.
- Burke, J. F., Sharan, A. D., Sperling, M. R., Ramayya, A. G., Evans, J. J., Healey, M. K., ... Kahana, M. J. (2014). Theta and high-frequency activity mark spontaneous recall of episodic memories. *Journal of Neuroscience*, *34*(34), 11355–11365. doi: 10.1523/JNEUROSCI.2654-13.2014
- DelPozo-Banos, M., & Weidemann, C. T. (2017). Localized component filtering for electroencephalogram artifact rejection. *Psychophysiology*, *54*(4), 608-619.
- Gramfort, A., Luessi, M., Larson, E., Engemann, D. A., Strohmeier, D., Brodbeck, C., ... Hämäläinen, M. (2013). MEG and EEG data analysis with MNE-Python. *Frontiers in Neuroscience*, *7*(267). doi: 10.3389/fnins.2013.00267
- Gramfort, A., Luessi, M., Larson, E., Engemann, D. A., Strohmeier, D., Brodbeck, C., ... Hämäläinen, M. (2014). MNE software for processing MEG and EEG data. *NeuroImage*, *86*, 446–460. doi: 10.1016/j.neuroimage.2013.10.027
- Greenberg, J. A., Burke, J. F., Haque, R., Kahana, M. J., & Zaghoul, K. A. (2015, July). Decreases in theta and increases in high frequency activity underlie associative memory encoding. *NeuroImage*, *114*, 257–263. doi: 10.1016/j.neuroimage.2015.03.077
- Guderian, S., & Düzel, E. (2005). Induced theta oscillations mediate large-scale synchrony with mediotemporal areas during recollection in humans. *Hippocampus*, *15*(7), 901–912.
- Herweg, N. A., Aritz, T., Leicht, G., Mulert, C., Fuentemilla, L., & Bunzeck, N. (2016). Theta-alpha oscillations bind the hippocampus, prefrontal cortex, and striatum during recollection: Evidence from simultaneous EEG–fMRI. *J Neurosci*, *36*(12), 3579–3587.
- Herweg, N. A., Solomon, E., & Kahana, M. J. (2020). Theta oscillations in human memory. *Trends in Cognitive Science*, *24*(3), 208-227.
- Hsieh, L.-T., & Ranganath, C. (2014). Frontal midline theta oscillations during working memory maintenance and episodic encoding and retrieval. *NeuroImage*, *85*, 721 - 729.
- Jacobs, J., Hwang, G., Curran, T., & Kahana, M. J. (2006). EEG oscillations and recognition memory: Theta correlates of memory retrieval and decision making. *NeuroImage*, *15*(2), 978–87.
- Kahana, M. J. (2020, January). Computational models of memory search. *Annual Review of Psychology*, *71*(1), 107–138. Retrieved from

<https://doi.org/10.1146/annurev-psych-010418-103358> doi: 10.1146/annurev-psych-010418-103358

- Kahana, M. J., Aggarwal, E. V., & Phan, T. D. (2018). The variability puzzle in human memory. *Journal of Experimental Psychology: Learning, Memory, and Cognition*, *44*(12), 1857–1863. doi: 10.1037/xlm0000553
- Kahana, M. J., Dolan, E. D., Sauder, C. L., & Wingfield, A. (2005). Intrusions in episodic recall: Age differences in editing of overt responses. *Journal of Gerontology: Psychological Sciences*, *60*(2), 92–97. doi: 10.1093/geronb/60.2.P92
- Klimesch, W., Doppelmayr, M., Russegger, H., & Pachinger, T. (1996). Theta band power in the human scalp EEG and the encoding of new information. *NeuroReport*, *7*, 1235–1240.
- Kragel, P. A., Koban, L., Barrett, L. F., & Wager, T. D. (2018). Representation, pattern information, and brain signatures: From neurons to neuroimaging. *Neuron*, *99*(2), 257–273.
- Loftus, G. R., & Masson, M. E. J. (1994). Using confidence intervals in within-subject designs. *Psychonomic Bulletin & Review*, *1*(4), 476–490. doi: 10.3758/BF03210951
- Lohnas, L. J., Polyn, S. M., & Kahana, M. (2015). Expanding the scope of memory search: Modeling intralist and interlist effects in free recall. *Psychological Review*, *122*(2), 337–363. doi: 10.1037/a0039036
- Long, N. M., Sperling, M. R., Worrell, G. A., Davis, K. A., Gross, R. E., Lega, B. C., . . . Kahana, M. J. (2017). Contextually mediated spontaneous retrieval is specific to the hippocampus. *Current Biology*, *27*(7), 1074–1079. doi: 10.1016/j.cub.2017.02.054
- Murdock, B. B., & Okada, R. (1970). Interresponse times in single-trial free recall. *Journal of Verbal Learning and Verbal Behavior*, *8*, 263–267.
- Osipova, D., Takashima, A., Oostenveld, R., Fernández, G., Maris, E., & Jensen, O. (2006). Theta and gamma oscillations predict encoding and retrieval of declarative memory. *Journal of Neuroscience*, *26*(28), 7523–7531. doi: 10.1523/JNEUROSCI.1948-06.2006
- Rohrer, D., & Wixted, J. T. (1994). An analysis of latency and interresponse time in free recall. *Memory & Cognition*, *22*, 511–524.
- Solomon, E., Kragel, J., Sperling, M., Sharan, A., Worrell, G., Kucewicz, M., . . . Kahana, M. (2017). Widespread theta synchrony and high-frequency desynchronization underlies enhanced cognition. *Nature Communications*, *8*(1), 1704. doi: 10.1038/s41467-017-01763-2
- Solomon, E. A., Lega, B. C., Sperling, M. R., & Kahana, M. J. (2019). Hippocampal theta codes for distances in semantic and temporal spaces. *PNAS*, *116*(48), 24343–24352.
- Solomon, E. A., Stein, J. M., Das, S., Gorniak, R., Sperling, M. R., Worrell, G., . . . Kahana, M. J. (2019). Dynamic theta networks within the human medial temporal lobe support episodic encoding and retrieval. *Current Biology*, *29*(7), 1100–1111. doi: 10.1016/j.cub.2019.02.020
- Staudigl, T., & Hanslmayr, S. (2013). Theta oscillations at encoding mediate the context-dependent nature of human episodic memory. *Current Biology*, *23*(12), 1101–1106.
- Underwood, B. J. (1957). Interference and forgetting. *Psychological Review*, *64*, 49–60. doi: 10.1037/h0044616
- van Vugt, M. K., Sekuler, R., Wilson, H. R., & Kahana, M. J. (2013). An electrophysiologi-

cal signature of summed similarity in visual working memory. *Journal of Experimental Psychology: General*, 142(2), 412–425.

Weidemann, C. T., & Kahana, M. J. (2020). Neural measures of subsequent memory reflect endogenous variability in cognitive function. *Journal of Experimental Psychology: Learning, Memory, and Cognition*.

Zaromb, F. M., Howard, M. W., Dolan, E. D., Sirotin, Y. B., Tully, M., Wingfield, A., & Kahana, M. J. (2006). Temporal associations and prior-list intrusions in free recall. *Journal of Experimental Psychology: Learning, Memory, and Cognition*, 32(4), 792–804. doi: 10.1037/0278-7393.32.4.792
